# Supplementary material
Source: PubMed Central journal article supplement (PMC4178678)
Supplement: AEM.02093-14_zam999105701so1.pdf [file AEM.02093-14_zam999105701so1.pdf]

**Supplemental material**

**The *para*-Nitrophenol Catabolic Gene Cluster is Responsible for  
2-Chloro-4-nitrophenol Degradation in *Burkholderia* sp. Strain SJ98**

Jun Min<sup>1,2</sup>, Jun-Jie Zhang<sup>1</sup> and Ning-Yi Zhou<sup>1\*</sup>

<sup>1</sup>Key Laboratory of Agricultural and Environmental Microbiology, Wuhan Institute of  
Virology, Chinese Academy of Sciences, Wuhan 430071, China

<sup>2</sup>University of Chinese Academy of Sciences, Beijing 100049, China

\*Corresponding author: Ning-Yi Zhou, Email: n.zhou@pentium.whiov.ac.cn;

Tel: 86-27-87197655; Fax: 86-27-87197655

**Table S1** Maximum specific growth rates ( $\mu_m$ ) of bacteria with different substrates

| Carbon source <sup>a</sup> | Strains             | $\mu_m(\text{h}^{-1})^b$ |
|----------------------------|---------------------|--------------------------|
| PNP                        | SJ98                | 0.254                    |
|                            | SJ98 $\Delta pnpA1$ | 0.191                    |
| 2C4NP                      | SJ98                | 0.237                    |
|                            | SJ98 $\Delta pnpA1$ | 0.166                    |

<sup>a</sup> Bacteria, grown with 2 mM glucose as carbon source to an OD<sub>600</sub> of 0.5, were induced by 0.3 mM of PNP or 2C4NP for 5 h, the cells were harvested, washed twice with MM prior to inoculation for growth on PNP or 2C4NP (1% inoculums from culture with OD<sub>600</sub> of 0.5, v/v).

<sup>b</sup>  $\mu_m$  was expressed with the average value (n=3).

19

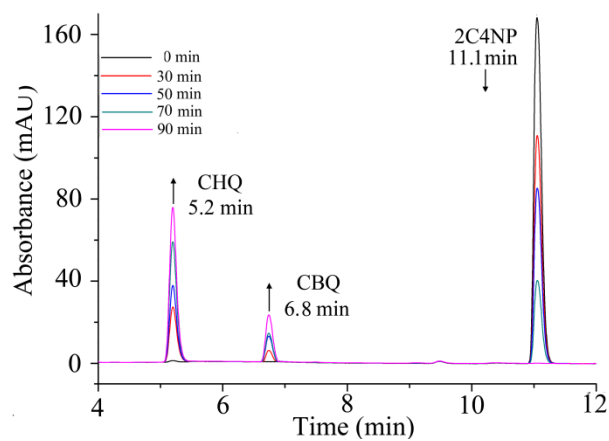

20

21 **Fig. S1** HPLC analyses of the intermediates generated during 2C4NP degradation by strain  
22 SJ98 in whole cell biotransformation. The arrows indicate the trends of consumption or  
23 accumulation of the compounds.

24

25

26

27

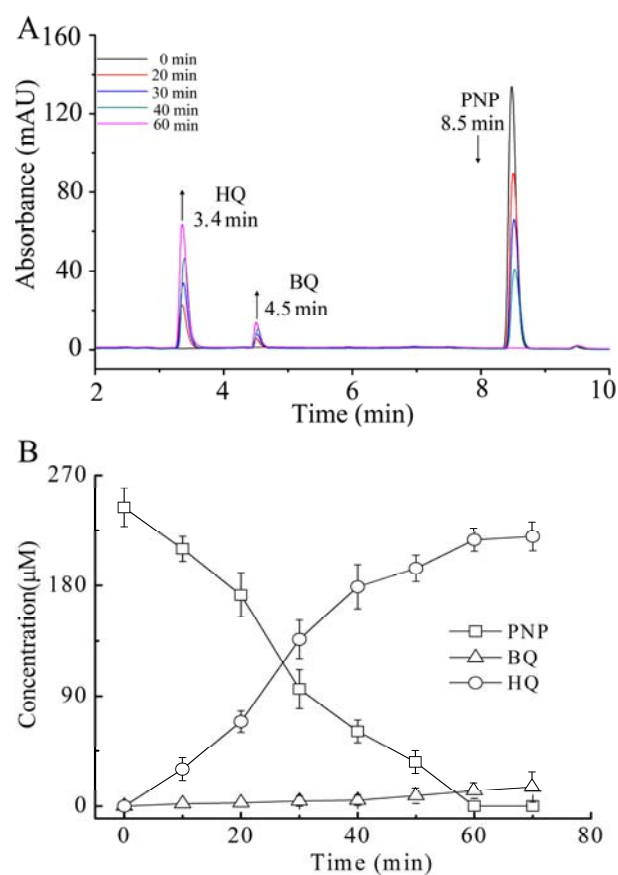

**Fig. S2** Qualitative (A) and quantitative (B) HPLC analyses of the intermediates generated during degradation of PNP by PNP-induced strain SJ98 in biotransformation studies. The arrows indicate the trends of the consumption or accumulation of the compounds. The quantitative experiments were performed in triplicate; the results were the average of three independent experiments, and the error bars show standard deviations.

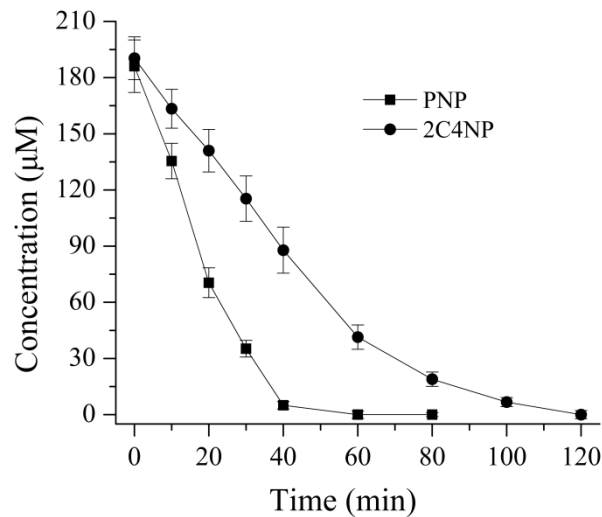

**Fig. S3** Biotransformation of PNP and 2C4NP by PNP-induced *Pseudomonas* sp. strain WBC-3. The quantitative experiments were performed in triplicate; the results were the average of three independent experiments, and the error bars show standard deviations.

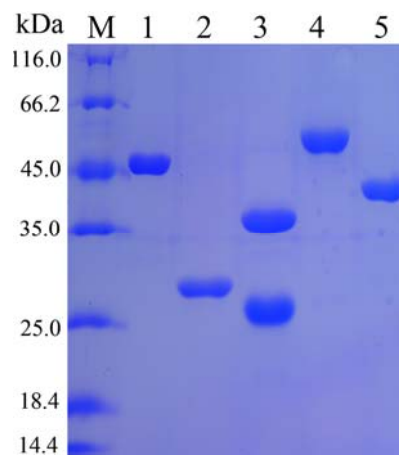

**Fig. S4** SDS-PAGE of purified recombinant Pnp proteins. Lane M: molecular mass standards (sizes in kDa are shown on the left); lane 1: purified His<sub>6</sub>-PnpA; lane 2: His<sub>6</sub>-PnpB; lane 3: His<sub>6</sub>-PnpCD; lane 4: His<sub>6</sub>-PnpE and lane 5: His<sub>6</sub>-PnpF.
